# Supplementary material for: Neutral competition of stem cells is skewed by proliferative changes downstream of Hh and Hpo
Source: PubMed Central journal article supplement — EMBO J. 2014 Aug 4;33(20):2295–313. doi: 10.15252/embj.201387500 (PMC4253521; doi:10.15252/embj.201387500), 2014-08-04
Supplement: embj0033-2295-sd8.pdf [file embj0033-2295-sd8.pdf]

**Table S1 : Niche size is not altered in testes with *ptc* mutant clones.**

| <b>Genotype of clones</b>            | <b>Number of hub cells (SEM)</b> | <b>Number of testes counted.</b> |
|--------------------------------------|----------------------------------|----------------------------------|
| Control ( <i>FRT<sup>42D</sup></i> ) | 14.1 (0.49)                      | 20                               |
| <i>ptc</i>                           | 14.25 (0.50)                     | 20                               |

The number of hub cells (which express low *Zfh1* and have small nuclei) was counted in testes in which either control or *ptc* mutant clones were present at 14 dpci. No significant difference was observed ( $p < 0.83$ ).
