# Supplementary material for: Neutral competition of stem cells is skewed by proliferative changes downstream of Hh and Hpo
Source: PubMed Central journal article supplement — EMBO J. 2014 Aug 4;33(20):2295–313. doi: 10.15252/embj.201387500 (PMC4253521; doi:10.15252/embj.201387500), 2014-08-04
Supplement: embj0033-2295-sd9.pdf [file embj0033-2295-sd9.pdf]

**Table S2 : CySC clone recovery for gain-of-function in factors controlling cellular growth.**

| <b>% testes with marked CySC clones<br/>(n)</b>       | <b>2 dpci</b> | <b>7 dpci</b> | <b>14 dpci</b> |
|-------------------------------------------------------|---------------|---------------|----------------|
| MARCM FRT <sup>40A</sup> control                      | 73.6<br>(53)  | 50.0<br>(44)  | 33.3<br>(66)   |
| MARCM FRT <sup>40A</sup> , UAS-Dp110                  | 78.3<br>(46)  | 18.9<br>(74)  | 0<br>(55)      |
| MARCM FRT <sup>40A</sup> <i>Pten</i> <sup>df189</sup> | 67.4<br>(46)  | 8.0<br>(38)   | 1.4<br>(70)    |
| MARCM FRT <sup>40A</sup> UAS-dMyc                     | 61.0<br>(41)  | 40.8<br>(49)  | 15.1<br>(40)   |
|                                                       |               |               |                |
| MARCM FRT <sup>82B</sup> control                      | 65.2<br>(46)  | 48.2<br>(29)  | 41.4<br>(58)   |
| MARCM FRT <sup>82B</sup> <i>Tsc1</i> <sup>29</sup>    | 66.7<br>(27)  | 1.8<br>(57)   | 0<br>(51)      |

Percent of testes with CySC MARCM clones. The number of testes examined is indicated in parentheses.
