# Supplementary figures and images for: Neutral competition of stem cells is skewed by proliferative changes downstream of Hh and Hpo
Source: PubMed Central journal article supplement — EMBO J. 2014 Aug 4;33(20):2295–313. doi: 10.15252/embj.201387500 (PMC4253521; doi:10.15252/embj.201387500), 2014-08-04

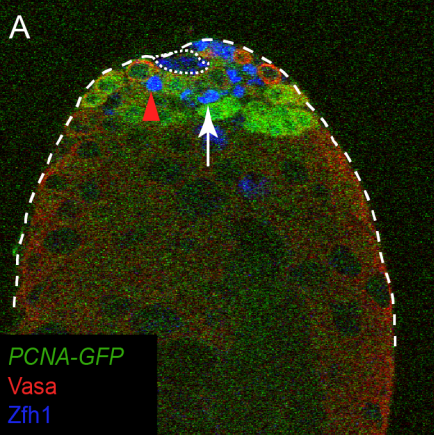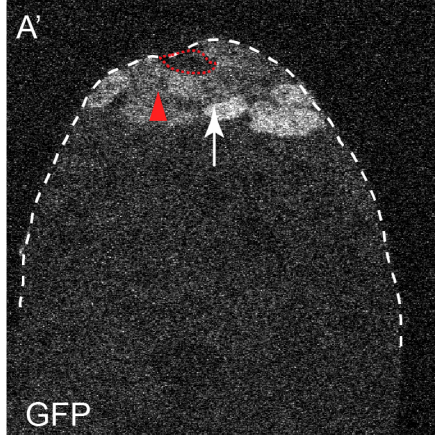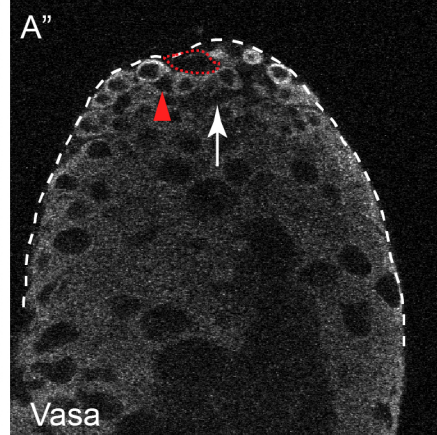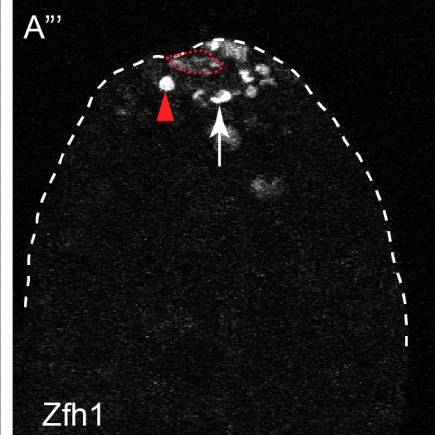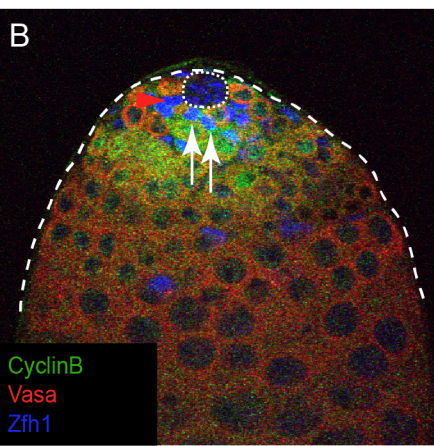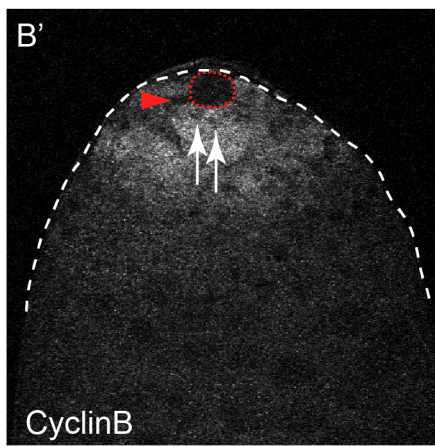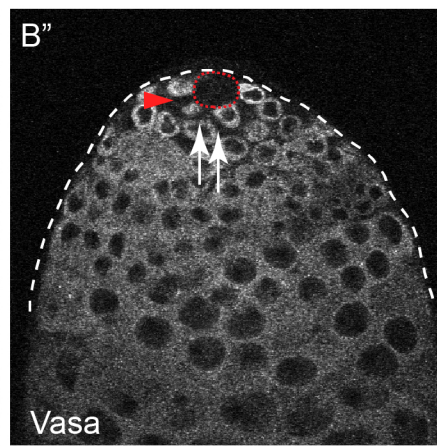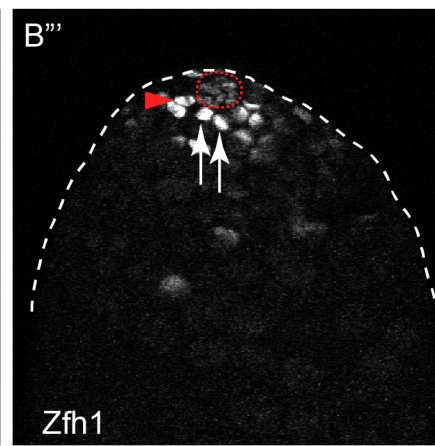

Supplement: embj0033-2295-sd1.pdf [file embj0033-2295-sd1.pdf]

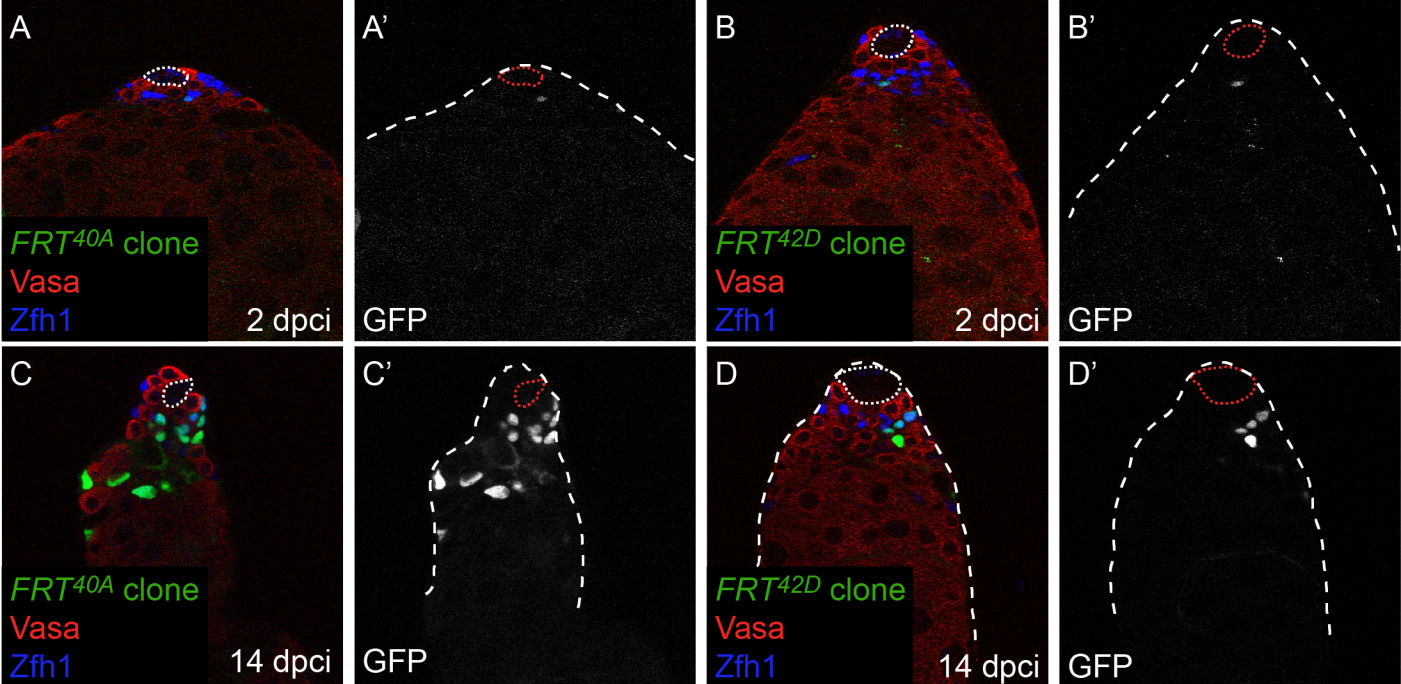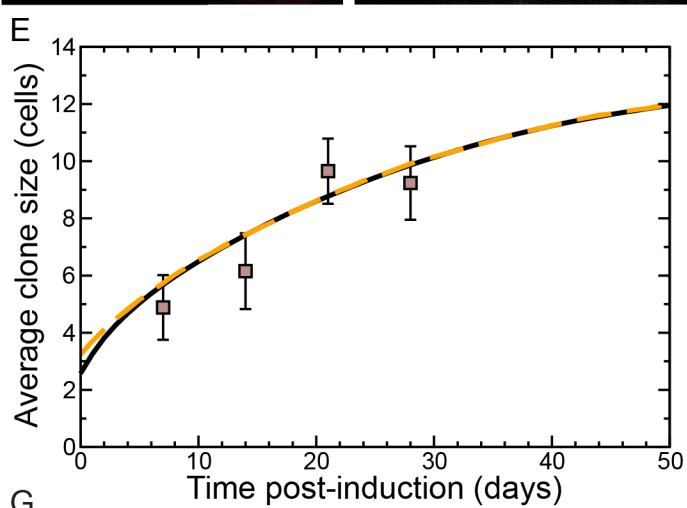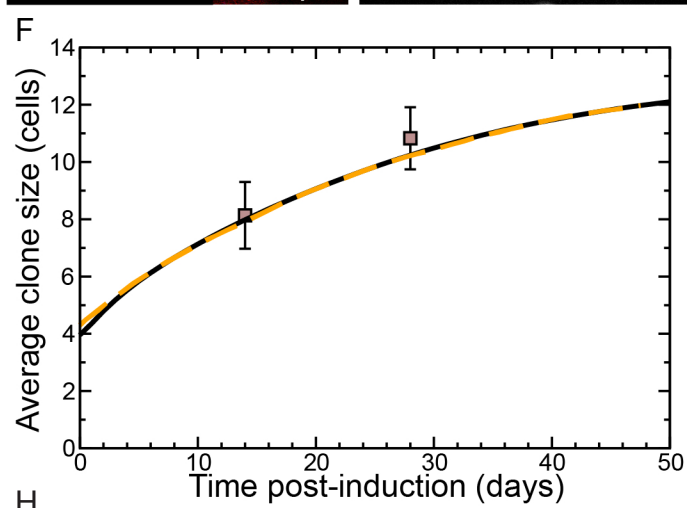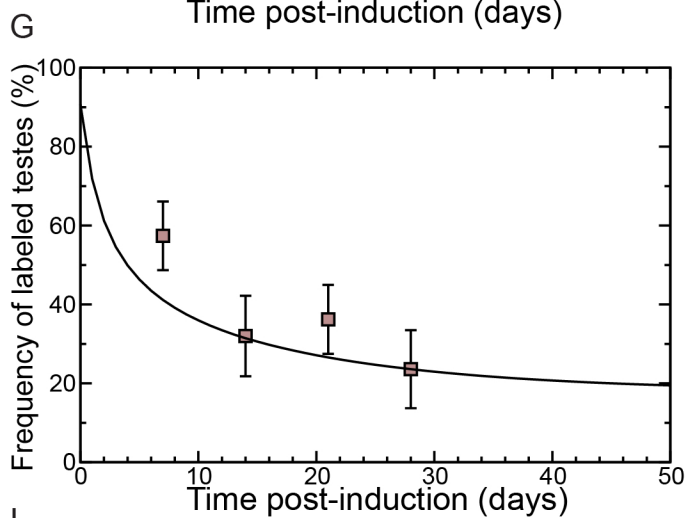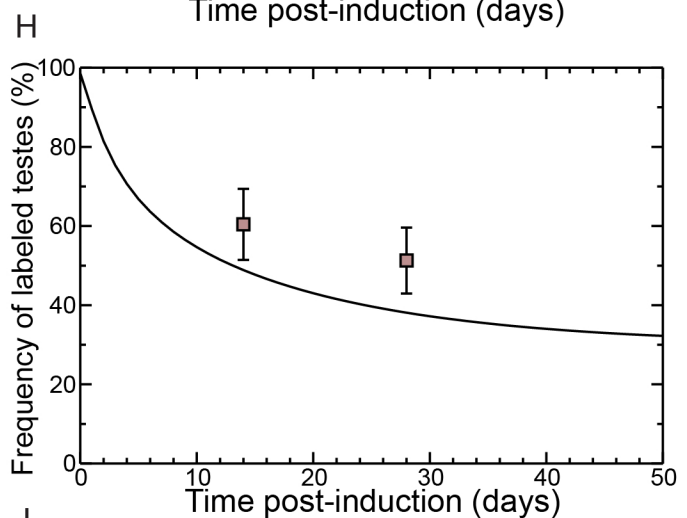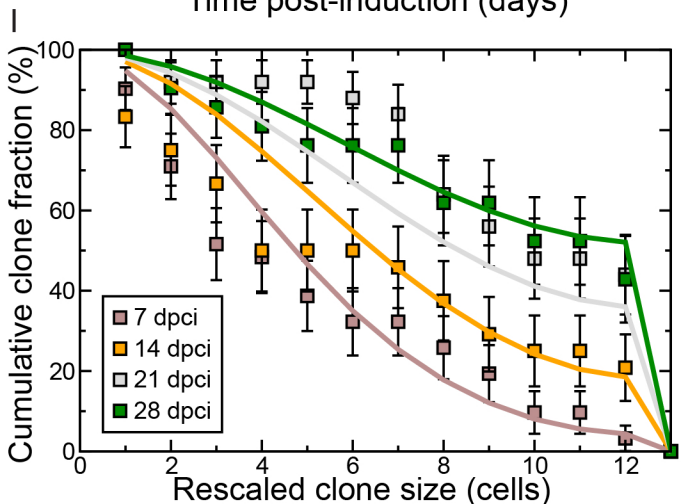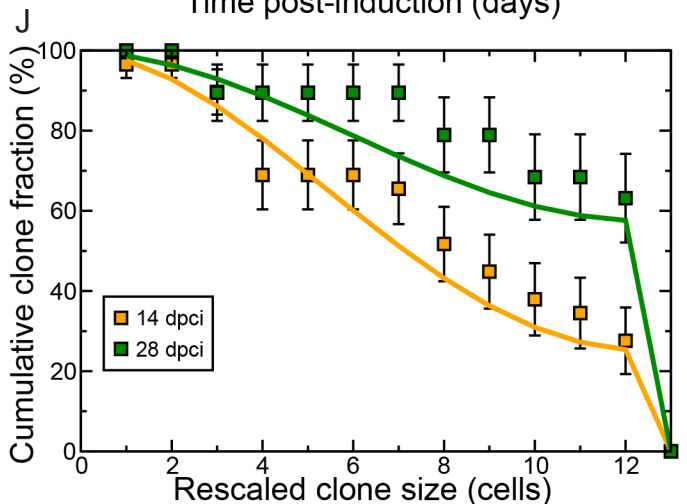

Supplement: embj0033-2295-sd2.pdf [file embj0033-2295-sd2.pdf]

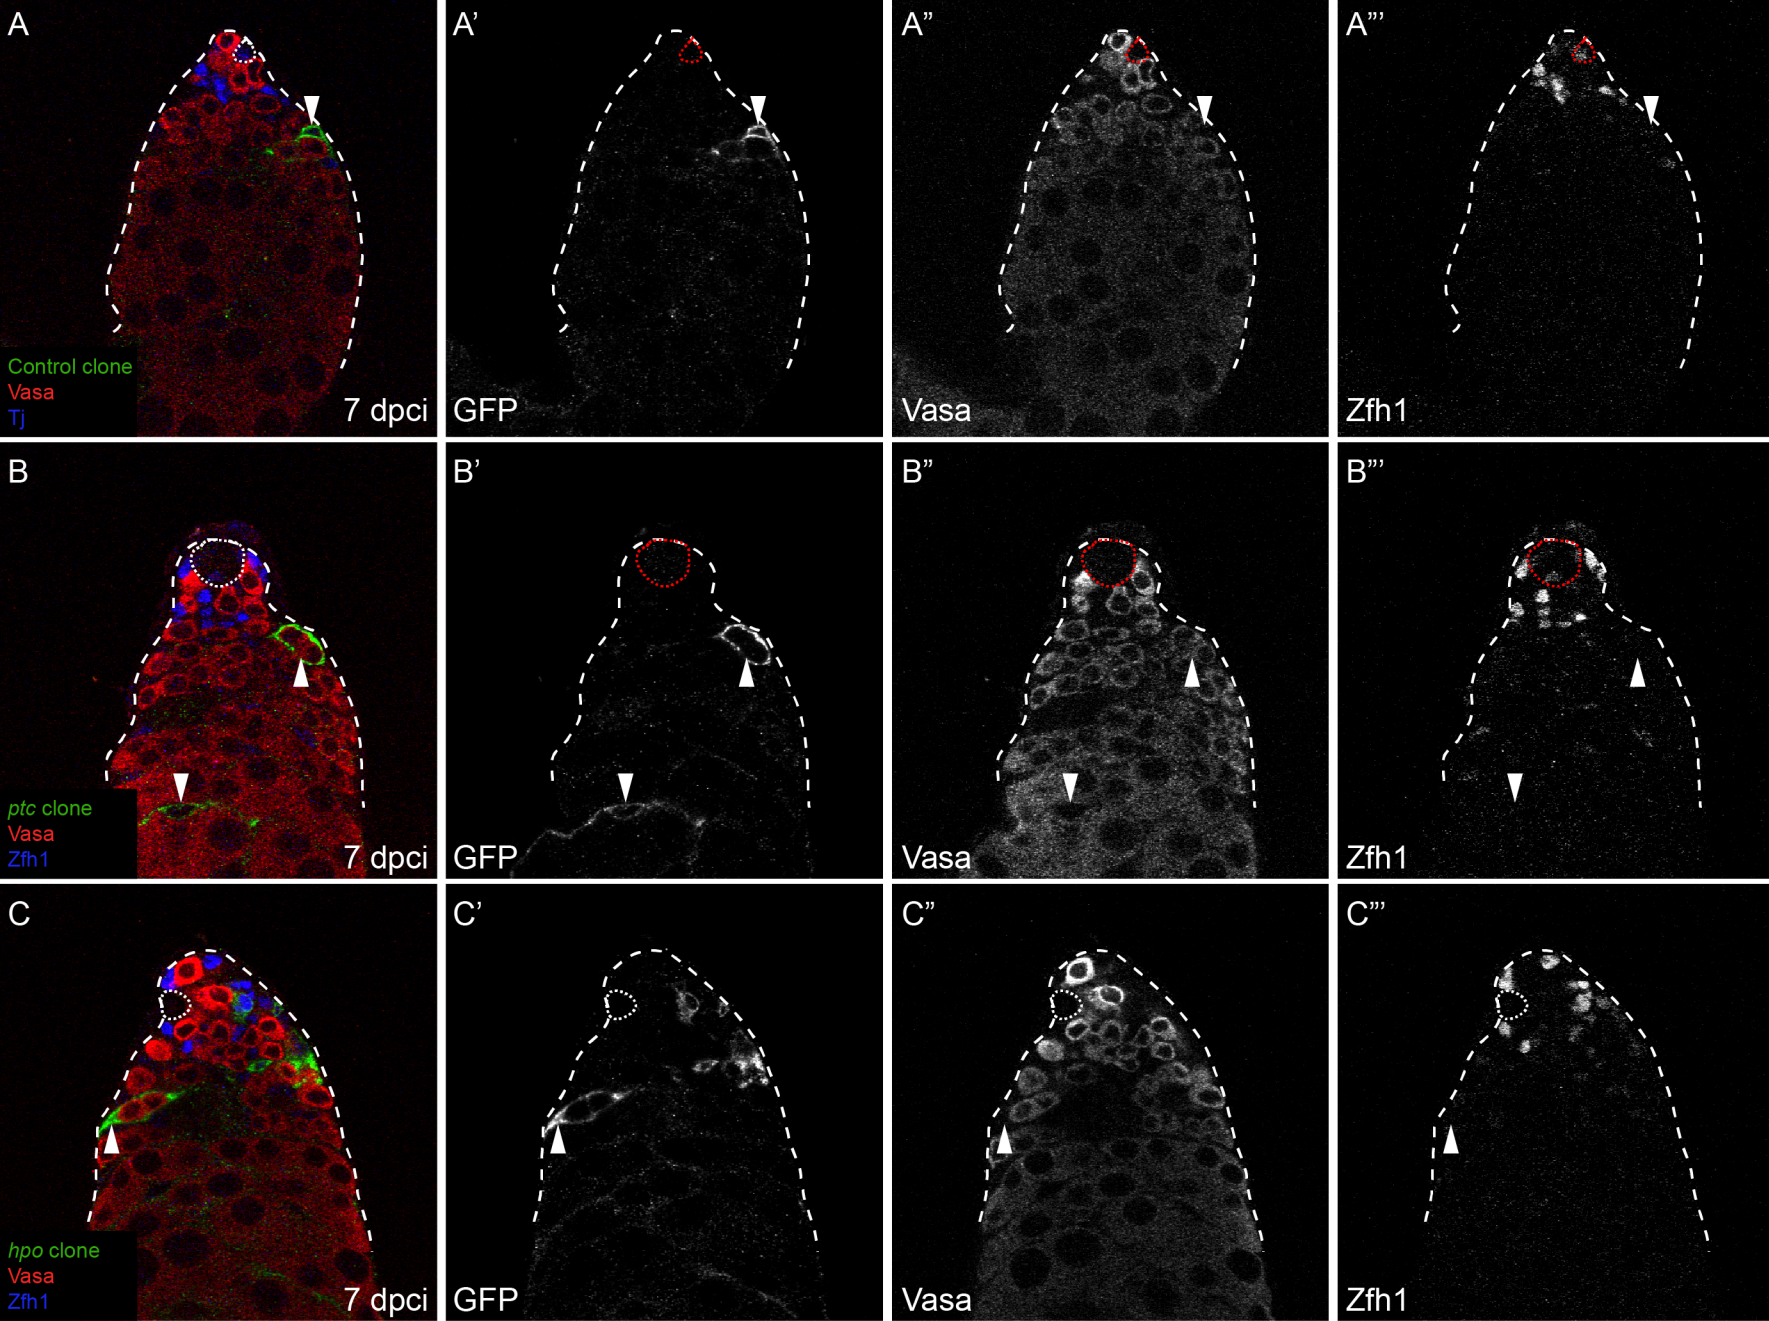

Supplement: embj0033-2295-sd3.pdf [file embj0033-2295-sd3.pdf]

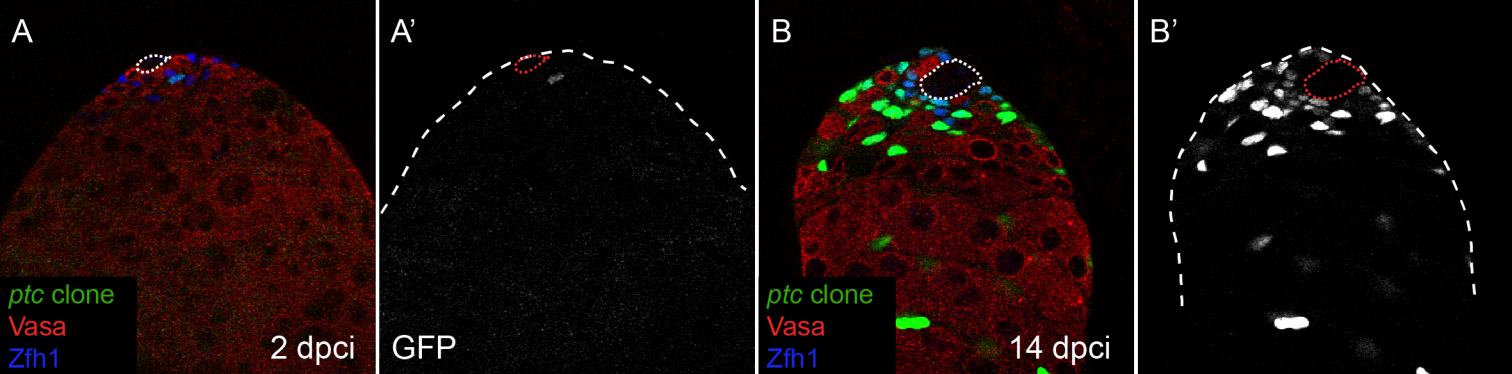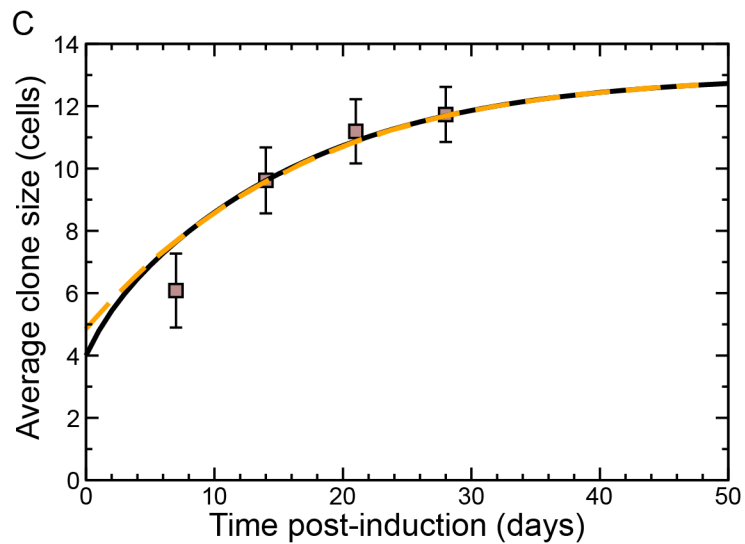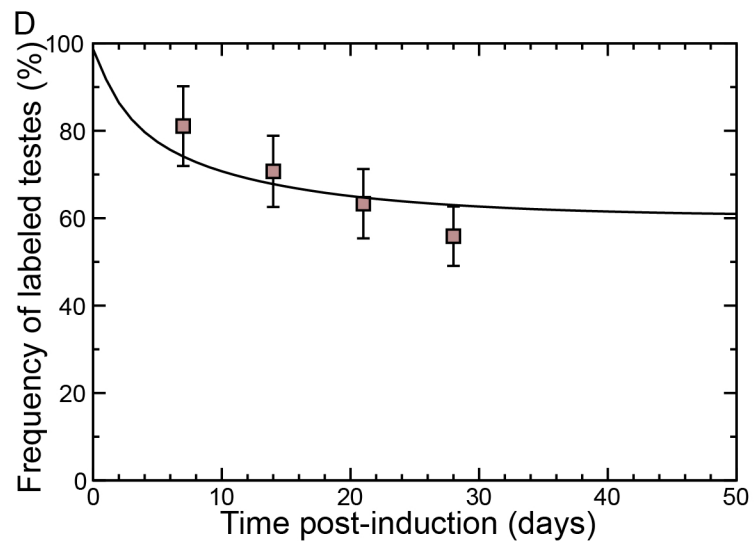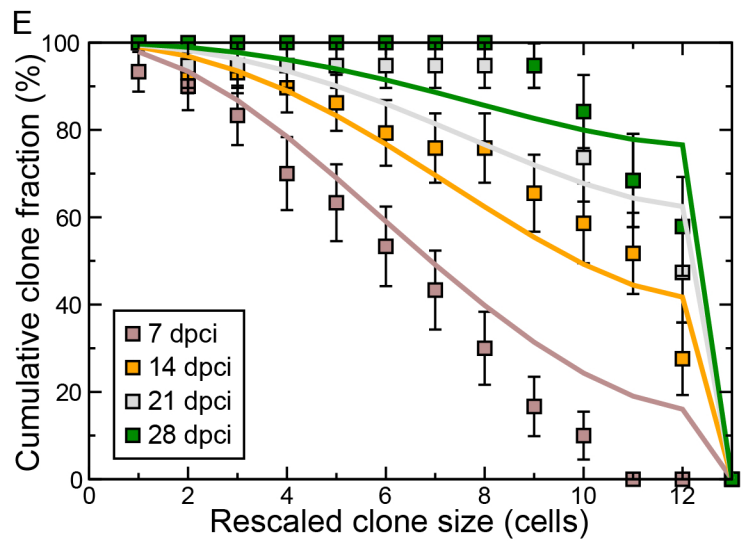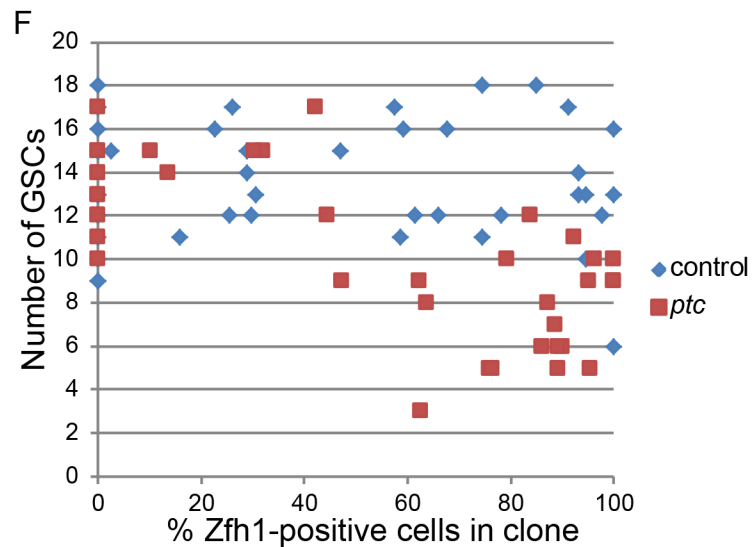

Supplement: embj0033-2295-sd4.pdf [file embj0033-2295-sd4.pdf]

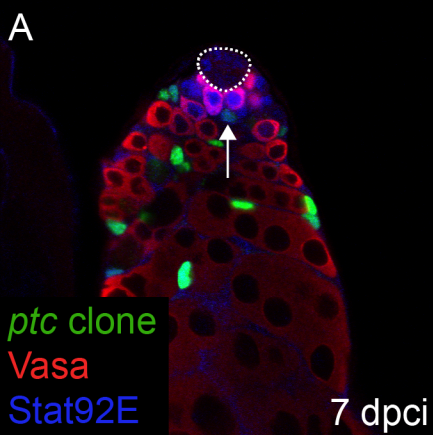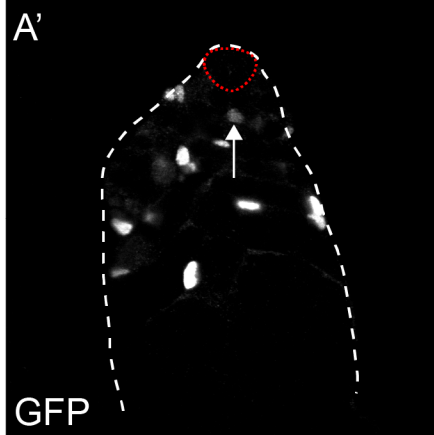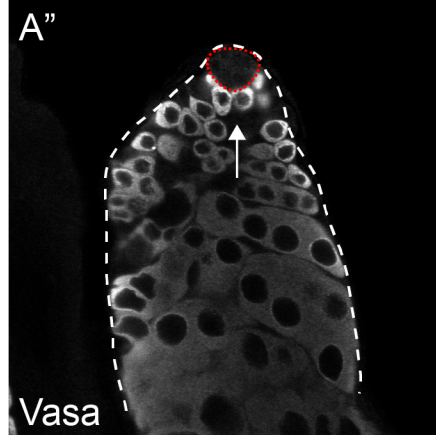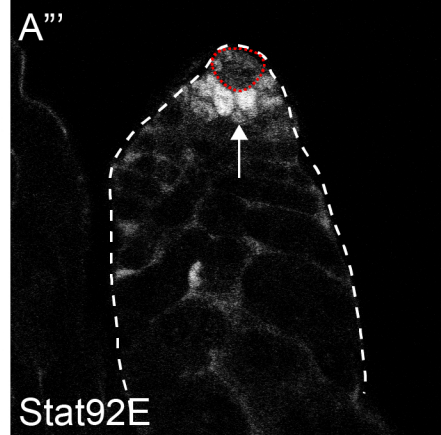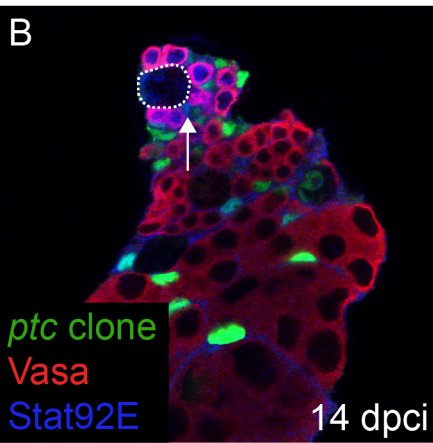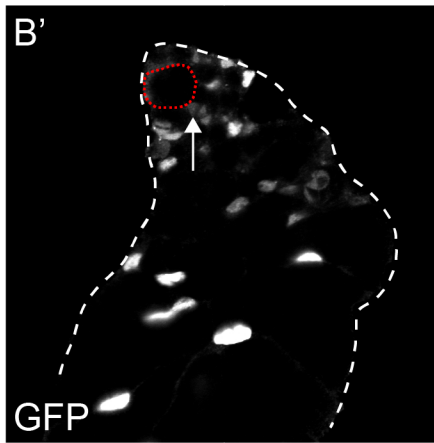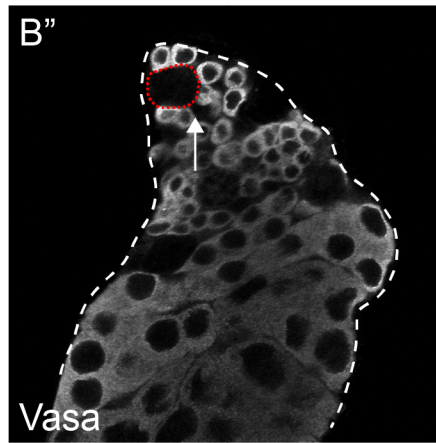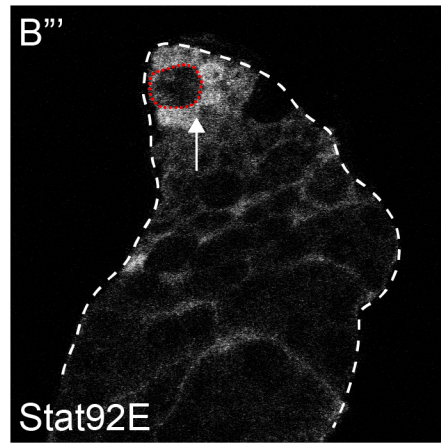

Supplement: embj0033-2295-sd5.pdf [file embj0033-2295-sd5.pdf]

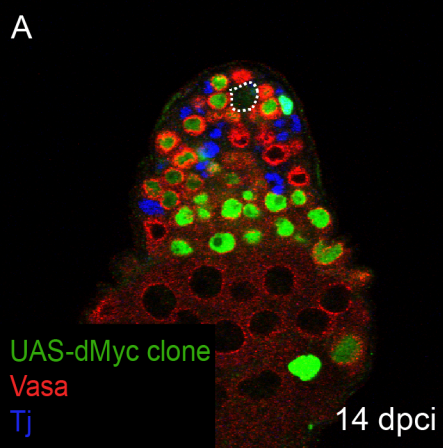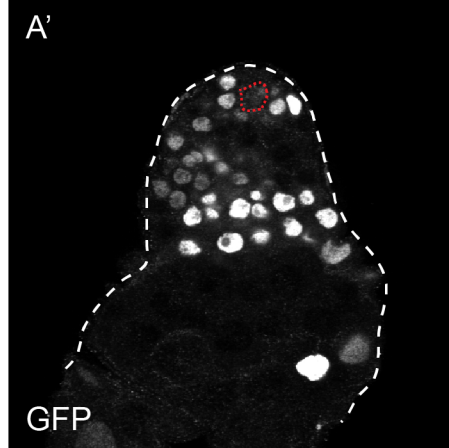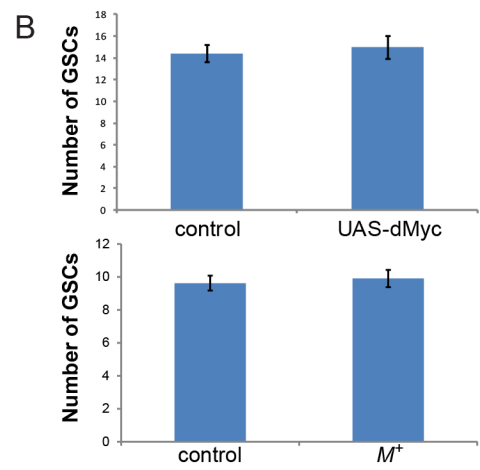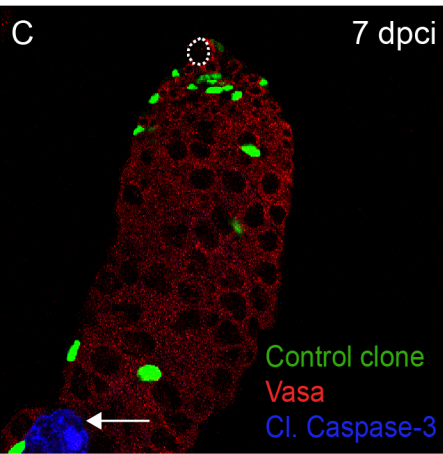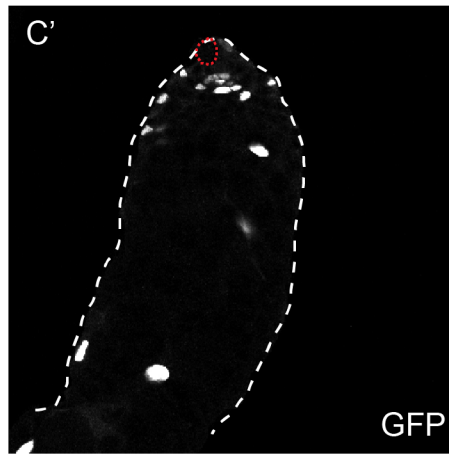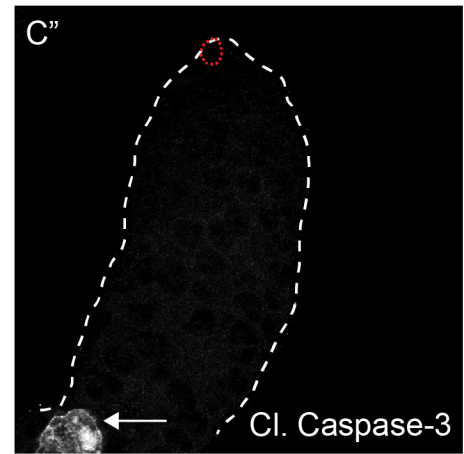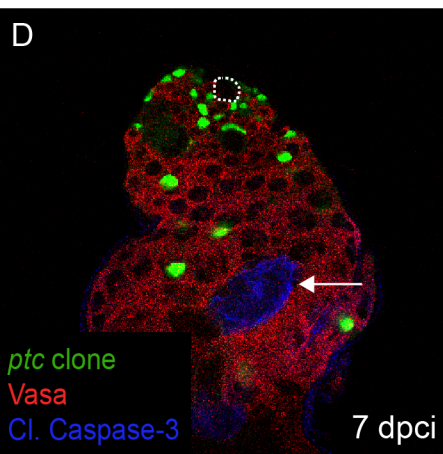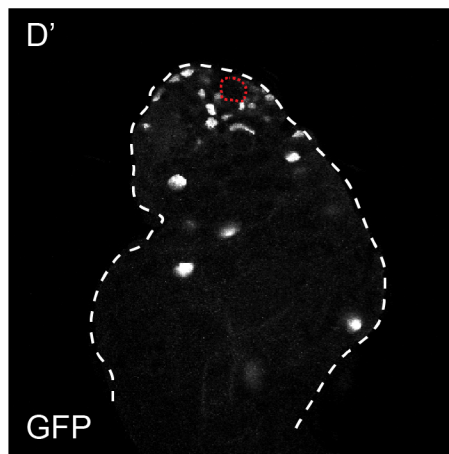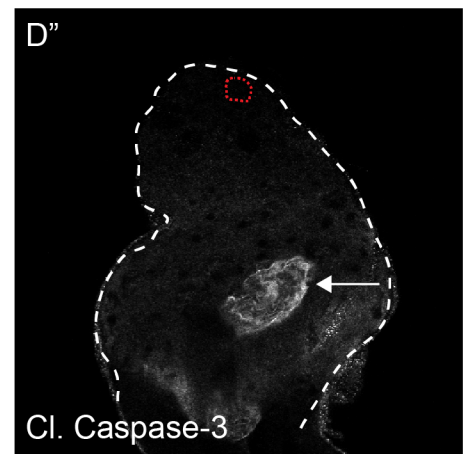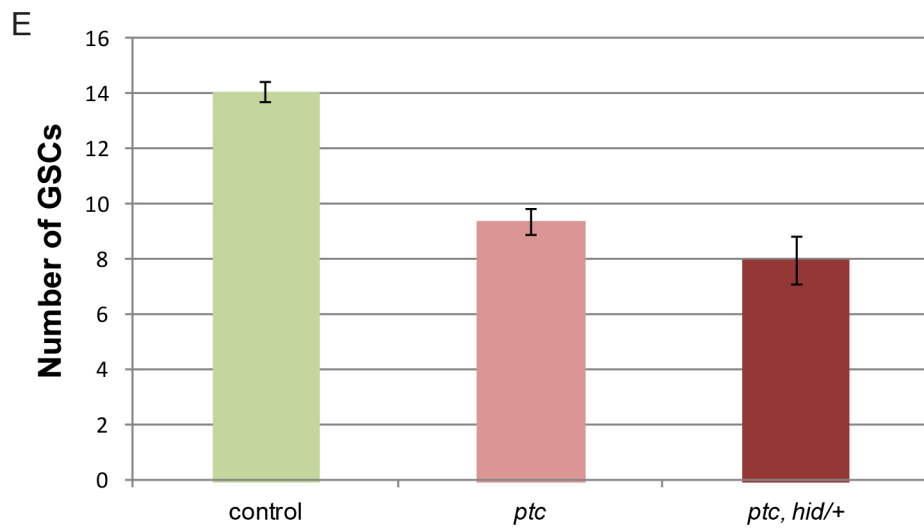

Supplement: embj0033-2295-sd6.pdf [file embj0033-2295-sd6.pdf]

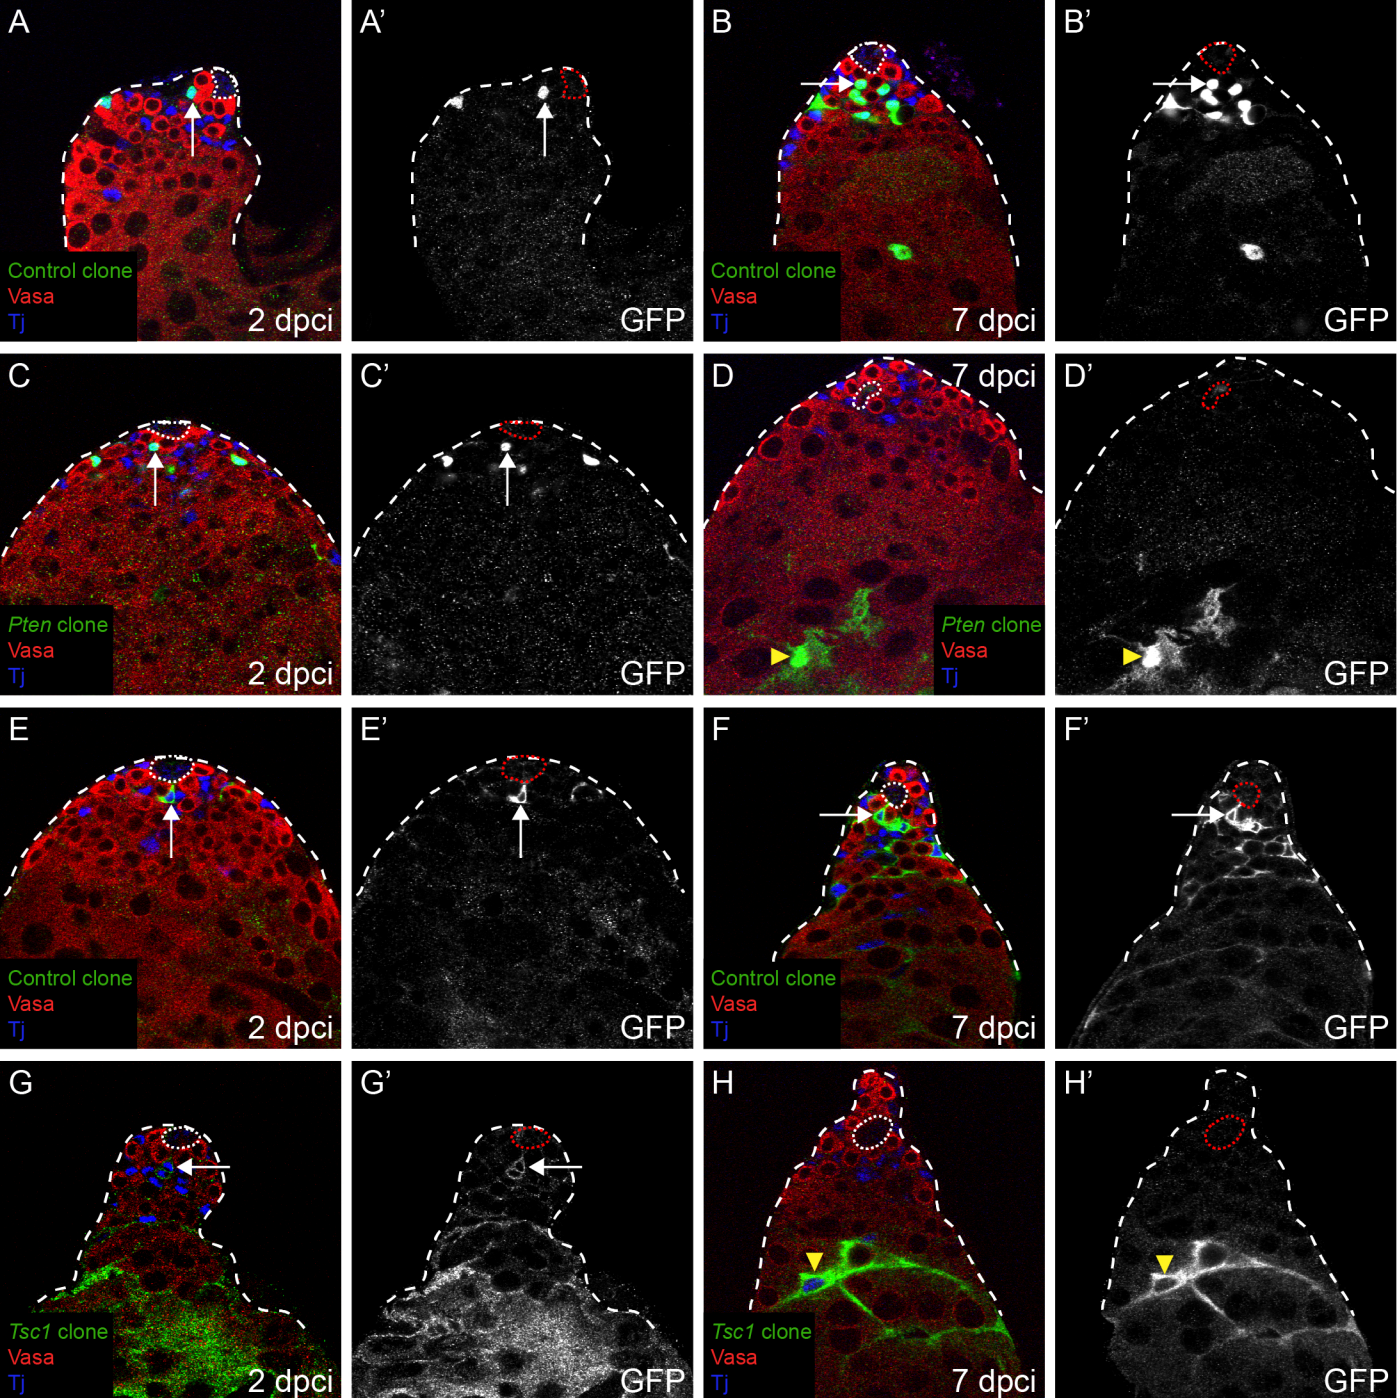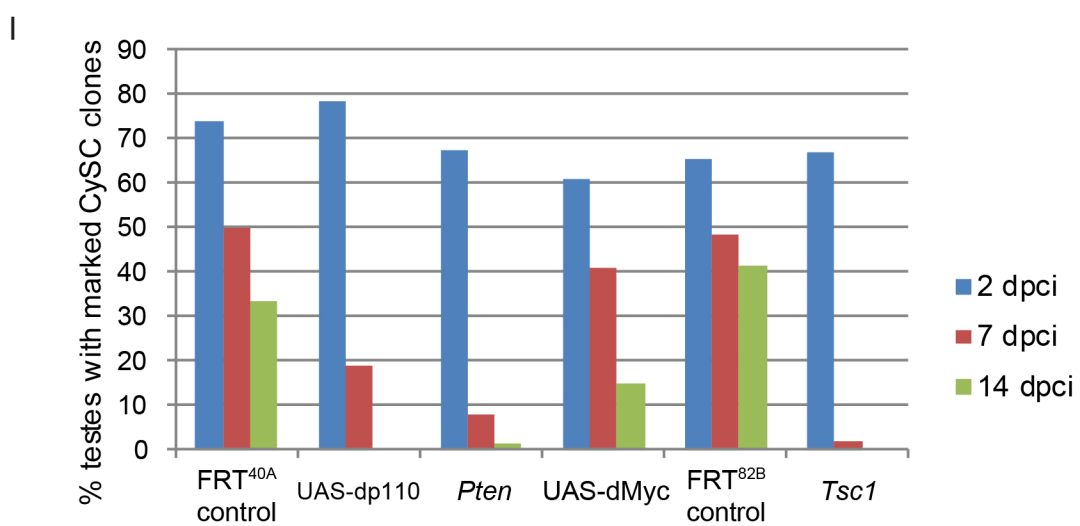

Supplement: embj0033-2295-sd7.pdf [file embj0033-2295-sd7.pdf]
